# Supplementary material for: Path for recovery: an ecological overview of the Jambato Harlequin Toad (Bufonidae: Atelopus ignescens) in its last known locality, Angamarca Valley, Ecuador
Source: PeerJ. 2024 Jun 21;12:e17344. doi: 10.7717/peerj.17344 (PMC11195548; doi:10.7717/peerj.17344)
Supplement: Supplemental Information 2 — Tadpoles are denoted with the ‘-’ symbol. Recaptures are identified with an * after the field code. [file peerj-12-17344-s002.xlsx]

## Sheet: Hoja1
Table S1.
Field code	Sex	Stage	Date	Locality	Elevation	Latitude	Longitude
A1	Male	Adult	2021-05-12	Quilaló	2890	-1.12814	-78.9078
A2	Male	Adult	2021-05-12	Quilaló	2826	-1.12697	-78.9088
A3	Male	Adult	2021-05-12	Quilaló	2909	-1.12922	-78.9067
A4	Male	Adult	2021-05-12	Quilaló	2950	-1.13088	-78.9035
A5	Male	Adult	2021-05-12	Quilaló	2950	-1.13088	-78.9035
A6	Male	Adult	2021-05-12	Quilaló	2943	-1.13061	-78.9049
A7	Male	Adult	2021-05-12	Shuyo	2800	-1.12709	-78.9214
A8	Male	Adult	2021-05-12	Shuyo	2830	-1.13338	-78.9254
A9	Male	Adult	2021-05-12	Shuyo	2820	-1.1336	-78.9262
A10	Female	Adult	2021-07-12	Quilaló	3095	-1.13013	-78.9018
A11	Female	Adult	2021-08-12	Shuyo	2880	-1.12752	-78.9124
A12	Male	Adult	2021-08-12	Shuyo	2971	-1.1275	-78.9122
A13	Female	Adult	2021-08-12	Shuyo	2975	-1.12764	-78.9118
A14	Male	Adult	2021-08-12	Shuyo	2976	-1.12905	-78.9086
A15	Female	Adult	2021-08-12	Shuyo	2976	-1.13018	-78.9073
A16	Female	Adult	2021-08-12	Shuyo	2976	-1.13063	-78.9055
A17	Male	Adult	2021-08-12	Shuyo	2962	-1.13092	-78.9047
A18	Male	Adult	2021-08-12	Shuyo	2963	-1.13093	-78.9039
A19	Male	Adult	2021-08-12	Shuyo	2970	-1.13116	-78.9036
A20	Male	Adult	2021-08-12	Shuyo	2985	-1.13114	-78.9033
A21	Female	Adult	2021-10-12	Shuyo	2860	-1.12235	-78.9152
A22	Male	Adult	2021-10-12	Shuyo	2880	-1.11995	-78.9145
A23	Male	Adult	2021-10-12	Shuyo	2880	-1.1197	-78.9145
A24	-	Juvenile	02/26/22	Shuyo	2899	-1.12759	-78.9124
A25	Female	Adult	02/26/22	Shuyo	2899	-1.12759	-78.9124
A26	Female	Adult	02/26/22	Shuyo	2915	-1.12787	-78.9114
A27	Female	Adult	02/26/22	Shuyo	2927	-1.13031	-78.9069
A28	Female	Adult	02/26/22	Shuyo	2931	-1.13018	-78.9064
A29	Male	Adult	02/26/22	Shuyo	2930	-1.1307	-78.9053
A30	Male	Adult	02/26/22	Shuyo	2939	-1.13102	-78.9041
A31	Male	Adult	02/26/22	Shuyo	2945	-1.13132	-78.9035
Aig-001	Female	Adult	2022-11-04	Quilaló	2916	-1.12861	-78.9091
Aig-002	Female	Adult	2022-11-04	Quilaló	2922	-1.1288	-78.9089
Aig-003	Male	Adult	2022-11-04	Quilaló	2922	-1.1288	-78.9089
-	-	Tadpole	2022-12-04	Quilaló	2865	-1.12679	-78.9106
-	-	Tadpole	2022-12-04	Quilaló	2821	-1.12525	-78.9153
Aig-004	Female	Adult	2022-12-04	Quilaló	2892	-1.12706	-78.9108
Aig-005	Female	Adult	04/13/22	Quilaló	2958	-1.13091	-78.9038
Aig-006	Female	Adult	04/13/22	Quilaló	2901	-1.12884	-78.9088
Aig-007	Female	Adult	04/13/22	Quilaló	2911	-1.1283	-78.9097
-	-	Tadpole	04/14/22	Quilaló	2913	-1.12954	-78.9066
Aig-008	Male	Adult	04/14/22	Huantugloma	3063	-1.13628	-78.8959
Aig-009	Male	Adult	04/14/22	Huantugloma	3052	-1.13647	-78.8981
Aig-010	Male	Adult	04/14/22	Huantugloma	3055	-1.13658	-78.8983
Aig-011	Male	Adult	04/14/22	Huantugloma	3055	-1.13658	-78.8983
Aig-012	Female	Adult	04/14/22	Huantugloma	3133	-1.13499	-78.9008
-	-	Tadpole	2022-01-05	Quilaló	2918	-1.12955	-78.9061
Aig-015	Male	Adult	2022-03-05	Quilaló	2920	-1.12853	-78.9094
Aig-016	Female	Adult	2022-03-05	Quilaló	2960	-1.13123	-78.9039
Aig-017	Female	Sub adult	2022-03-05	Quilaló	2960	-1.13123	-78.9039
Aig-018	Female	Adult	2022-05-05	Arrayán Pata	2664	-1.13344	-78.9342
Aig-019	Female	Adult	2022-06-05	Chistilán	3313	-1.13766	-78.8835
Aig-020	Female	Adult	2022-07-05	Arrayán Pata	2670	-1.13335	-78.9341
Aig-021	Female	Adult	2022-07-05	Arrayán Pata	2643	-1.13374	-78.9341
Aig-024	Male	Adult	2022-02-06	Shuyo	2976	-1.13106	-78.904
Aig-037	Male	Sub adult	2022-02-06	Shuyo	2870	-1.12747	-78.9102
-	-	Tadpole	2022-03-06	Shuyo	2820	-1.12519	-78.9152
Aig-038	Male	Adult	2022-06-06	Shuyo	2990	-1.13132	-78.9032
Aig-039	Male	Sub adult	07/20/22	Shuyo	2938	-1.13134	-78.9037
-	-	Tadpole	10/24/22	Quilaló	2869	-1.12743	-78.9092
Aig-047	Female	Adult	10/24/22	Quilaló	2994	-1.13037	-78.9035
Aig-048	Female	Sub adult	10/24/22	Quilaló	2893	-1.12703	-78.9089
Aig-049	Female	Adult	10/24/22	Quilaló	2879	-1.12726	-78.9091
Aig-050	Female	Sub adult	10/28/22	Quilaló	2910	-1.12668	-78.9087
Aig-051	Female	Adult	10/28/22	Quilaló	2869	-1.12743	-78.9092
Aig-025* (Aig-018)	Female	Adult	11/21/22	Arrayán Pata	2662	-1.13347	-78.9341
Aig-026	Female	Adult	12/15/22	Quilaló	2884	-1.12716	-78.9092
Aig-027	Male	Adult	12/15/22	Quilaló	2840	-1.12595	-78.9127
Aig-028* (Aig-021)	Female	Adult	12/16/22	Arrayán Pata	2662	-1.13347	-78.9341
Aig-029	Female	Adult	12/17/22	Arrayán Pata	2650	-1.13242	-78.9289
Aig-030	-	Juvenile	12/17/22	Arrayán Pata	2657	-1.1325	-78.9289
Aig-031	Male	Adult	12/17/22	Arrayán Pata	2664	-1.1326	-78.9289
Aig-032	Female	Adult	12/18/22	Shuyo	2783	-1.12925	-78.9231
