# Supplementary material for: Path for recovery: an ecological overview of the Jambato Harlequin Toad (Bufonidae: Atelopus ignescens) in its last known locality, Angamarca Valley, Ecuador
Source: PeerJ. 2024 Jun 21;12:e17344. doi: 10.7717/peerj.17344 (PMC11195548; doi:10.7717/peerj.17344)
Supplement: Supplemental Information 3 — The asterisk represents points of absence for the species. [file peerj-12-17344-s003.xlsx]

## Sheet: Hoja1
Table S2.
Site	Date and time	Latitude	Longitude	Elevation (masl)	Ammonium mg/L	Phosphates mg/L	Nitrates mg/L	Discharge (m3/s)	Temperature (°C)	Oxygen concentration (mg/L)	Oxygen Saturation (%Sat)	Specific conductivity (µS/cm)	Total Dissolved Solids (ppt)	pH (pH)	ORP (mV)	Temperature (°C)	Benthic Algal Biomass (Clorophill a µg/cm2)	QBR	IHF	ABI	Total Coliforms	Escherichia coli
Ucumari*	2022-10-05 13:56:48	-1.1482	-78.9653	2730	0.0781	0.018	0.011	0.1653	11.929	8.682	110.922	85.85	0.056	8.041	173.688	23.95	ND	55	97	120	32	0
Trib. Angamarca*	2022-10-05 15:16:36	-1.15056	-78.9405	2965	0.0452	0.0143	0.0129	0.3973	10.364	7.382	92.947	68.872	0.045	7.304	211.805	19.853	0.1554	70	100	168	23	0
Guambaine en Shuyo	2022-10-05 16:34:12	-1.1256	-78.9158	2815	0.0874	0.0106	0.0072	2.1907	11.903	7.076	91.615	155.099	0.101	7.427	219.632	15.88	0.1998	25	45	90	213	9
Guambaine-Bocatoma	2022-10-06 08:34:35	-1.13156	-78.9025	3025	0.071	0.0133	0.0091	3.7427	8.092	8.669	103.737	110.585	0.072	8.272	198.159	12.38	0.0111	75	90	85	36	0
Tributario-Acequia	2022-10-06 10:00:06	-1.1304	-78.9071	2925	0.1038	0.0103	0.0053	0.0015	11.486	7.792	101.118	295.216	0.192	8.413	157.599	20.56	0.0333	15	44	104	102	1
Tributario-Quillaló	2022-10-06 11:03:50	-1.12822	-78.9078	2890	0.0992	0.0113	0.0318	0.0089	15.743	6.517	92.392	397.663	0.258	8.56	169.234	42.136	0.4329	40	60	75	152	2
Guambaine-Medio	2022-10-06 11:15:49	-1.1282	-78.9079	2888	0.1414	0.0258	0.0072	2.8354	11.057	7.188	91.769	131.818	0.086	8.408	178.019	33.985	0.0888	65	90	89	70	1
Yalliví	2022-10-06 14:36:49	-1.12109	-78.9149	2872	0.0663	0.0302	0.011	0.6143	12.325	7.656	100.592	235.898	0.153	8.662	204.008	32.38	0.0222	25	80	131	140	17
Saravia	2022-10-06 15:48:56	-1.12449	-78.9265	2816	0.1132	0.0787	0.0186	0.6324	14.832	7.136	98.58	241.295	0.157	8.519	185.163	27.231	0.8658	30	84	65	432	269
Río Angamarca	2022-10-07 08:06:40	-1.1345	-78.9356	2580	0.0734	0.0359	0.0129	5.2519	9.85	120.017	118.74	139.571	169.414	-	-	18.18	0.0333	90	74	73	-	-
