# Supplementary material for: Path for recovery: an ecological overview of the Jambato Harlequin Toad (Bufonidae: Atelopus ignescens) in its last known locality, Angamarca Valley, Ecuador
Source: PeerJ. 2024 Jun 21;12:e17344. doi: 10.7717/peerj.17344 (PMC11195548; doi:10.7717/peerj.17344)
Supplement: Supplemental Information 4 [file peerj-12-17344-s004.xlsx]

## Sheet: Hoja1
Table S3.
ECFN	Class\Order	Family	Morphospecies	Samples	SC5635♀	SC5648♀	SC5660♀	SC5661♀	SC5662♀	SC5665♂	SC5666♂	SC5670♂	SC5673♀	SC5676♀	SC5677 juv.	SC5678 juv.	SC5679♂	SC5680♂	SC5689♀	SC5690♀	SC5692♀	SC5693♂	SC5695♂	SC5696♀	SC5697♀	SC5698♂	SC5699 juv.	SC5700♂	SC5701♂	SC5702♂	SC5705♀	Total number of specimens
ECFN5306	Acari\Oribatida	unknown	M1	complete		2									2						2											6
ECFN5320	Acari	unknown	M2	complete		1			6	2			2	4	15					1	7	5		1			1	8				53
ECFN5295	Acari\Oribatida	unknown	M3	complete								1																				1
ECFN5315	Acari\Oribatida	unknown	M4	complete																										6		6
ECFN937	Acari\Oribatida	unknown	M5	complete											2	14					1											17
ECFN5307	Acari\Oribatida	unknown	M6	complete											1																	1
ECFN5282	Acari\Oribatida	unknown	M7	complete		4									10																	14
ECFN5299	Acari\Oribatida	unknown	M8	complete												12				2	2						4	3		15	8	46
ECFN5297	Acari\Oribatida	unknown	M9	complete																			1					1	1			3
ECFN5300	Acari	unknown	M10	complete		3				5		17	18		12				2				2	2				1				62
ECFN5296	Acari\Oribatida	unknown	M11	complete	7	1	20		7	3	1	5	5	2	27	13	1	1	8		9	3		1	1			2	4	14	11	146
ECFN5281	Acari\Oribatida	unknown	M12	complete											4															3	4	11
ECFN5288	Acari\Oribatida	unknown	M13	complete	2	1	17		14	2	1	1	2	1	1	25	1		1	1	39						7	8			3	127
ECFN5289	Acari	unknown	M14	complete			5	1								15		2	1		10			33	3			2		1	7	80
ECFN5087	Acari	unknown	M15	complete					11																							11
ECFN5250	Arachnida\Araneae	Gnaphosidae	M1	carapace															1													1
ECFN5253	Arachnida\Araneae	Linyphiidae	M2	carapace				2				1		1		1					3			1					1		3	13
ECFN5212	Chilopoda	unknown	M1	complete									1																			1
ECFN5248	Insecta\Coleoptera	Carabidae	M1	abdomen	2		2		2				1								1										2	10
ECFN5251	Insecta\Coleoptera	Carabidae	M2	elytra			1				1																					2
ECFN5236	Insecta\Coleoptera	Carabidae	M3	elytra	1								1							5											1	8
ECFN5243	Insecta\Coleoptera	Curculionidae	M1	abdomen								1																				1
ECFN5260	Insecta\Coleoptera	Curculionidae	M2	abdomen																		1										1
ECFN5259	Insecta\Coleoptera	Curculionidae	M3	abdomen	3	1								2	1								1							1		9
ECFN5235	Insecta\Coleoptera	Curculionidae	M4	abdomen								2	2											2							1	7
ECFN5277	Insecta\Coleoptera	Curculionidae	M5	elytra		3																										3
ECFN5247	Insecta\Coleoptera	Curculionidae	M6	complete																											1	1
ECFN5284	Insecta\Coleoptera	Curculionidae	M7	complete		1																										1
ECFN5254	Insecta\Coleoptera	Dasytidae?	M1	elytra								1	6																	1		8
ECFN11252	Insecta\Coleoptera	Elateridae	M1	larva				1												2												3
ECFN5271	Insecta\Coleoptera	Erotylidae	M1	elytra	2		1					1	1												1					2		8
ECFN5237	Insecta\Coleoptera	Erotylidae	M2	elytra					2	2	1												1					1				7
ECFN5261	Insecta\Coleoptera	Latridiidae	M1	elytra	6		11		3				61	1					1						5	1						89
ECFN5257	Insecta\Coleoptera	Latridiidae	M2	elytra													2			1												3
ECFN5213	Insecta\Coleoptera	Ptiliidae	M1	complete								1	1			1																3
ECFN5264	Insecta\Coleoptera	Scolytidae	M1	elytra																										1		1
ECFN5256	Insecta\Coleoptera	Staphylinidae	M1	abdomen					1			1										1										3
ECFN5241	Insecta\Coleoptera	Staphylinidae	M2	elytra			2		5	1	7	2															1					18
ECFN5245	Insecta\Coleoptera	Staphylinidae	M3	complete	3	1	4	4	19	1	2	1	8	9	6	7	2		2	5	1	3	1	4			1	1	1	3	3	92
ECFN5268	Insecta\Coleoptera	Staphylinidae	M4	elytra																4	1									1		6
ECFN5249	Insecta\Coleoptera	Staphylinidae	M5	elytra								3	3																			6
ECFN11253	Insecta\Coleoptera	Staphylinidae	M1	larva										10					3				1									14
ECFN5211	Insecta\Coleoptera	Staphylinidae	M2	complete larva																											1	1
ECFN5258	Insecta\Coleoptera	unknown	M1	elytra																						1						1
ECFN5240	Insecta\Coleoptera	unknown	M2	elytra			7		2		1		3		1	3	9							3				1			3	33
ECFN5274	Insecta\Coleoptera	unknown	M3	complete			2										1															3
ECFN5252	Insecta\Coleoptera	unknown	M4	elytra									4	1						2					1							8
ECFN5244	Insecta\Coleoptera	unknown	M5	elytra							1																					1
ECFN5255	Insecta\Coleoptera	unknown	M6	elytra		1			2		1		2			1			1	1			3								1	13
ECFN5208	Insecta\Coleoptera	unknown	M7	elytra															1		1											2
ECFN5279	Insecta\Coleoptera	unknown	M1	complete larva		1																									1	2
ECFN5275	Insecta\Diptera	unknown	M1	heads	1	2		2					8																			13
ECFN5267	Gasteropoda	unknown	M1	shell				1																								1
ECFN5209	Insecta\Hemiptera	Tingidae	M1	abdomen		1												1							1				1	1		5
ECFN5276	Insecta\Hemiptera	Cydnidae	M1	body parts	1								1																			2
ECFN5266	Insecta\Hemiptera	unknown	M1	pronotum										1																		1
ECFN11254	Insecta\Hemiptera	unknown	M2	adult body parts								1											1									2
ECFN5278	Insect\Homoptera	unknown	M1	larva body parts	3								2						11		1										1	18
ECFN5234	Insect\Hymenoptera	Formicidae	M1	body parts	12	49	2	1	4	1		58	11					2			4				1				1	1		147
ECFN11251	Insect\Hymenoptera	Formicidae	M2	abdomen															1													1
ECFN5238	Insect\Hymenoptera	Formicidae	M3	complete		9							12								8											29
ECFN5242	Insect\Hymenoptera	unknown	M1	complete	1			2					2	3	4	1								1								14
ECFN5270	Insecta\Lepidoptera	unknown	M1	larva body parts																		1										1
ECFN5246	Arachnida\Pseudoscorpiones	unknown	M1	chela		2	2		1		1		1		1	2	1												1		1	13
ECFN5210	Unknown	unknown	M1	elytra														1														1
ECFN5272	Unknown	unknown	M2	elytra																									1			1
ECFN5265	Unknown	unknown	M1	larva body parts																				44								44
ECFN5262	Unknown	unknown	M2	complete larva				1						1																		2
Total					44	81	76	15	79	17	17	97	158	36	85	95	17	7	33	24	88	14	11	92	13	2	14	28	11	50	52	1262
