# Supplementary material for: Path for recovery: an ecological overview of the Jambato Harlequin Toad (Bufonidae: Atelopus ignescens) in its last known locality, Angamarca Valley, Ecuador
Source: PeerJ. 2024 Jun 21;12:e17344. doi: 10.7717/peerj.17344 (PMC11195548; doi:10.7717/peerj.17344)
Supplement: Supplemental Information 5 [file peerj-12-17344-s005.xlsx]

## Sheet: Hoja1
Table S4.
ECFN	Class\Order	Family	Morphospecies	Sample	Length (mm)
ECFN5306	Acari\Oribatida	unknown	M1	complete specimen	0.5
ECFN5320	Acari	unknown	M2	complete specimen	1.07
ECFN5295	Acari\Oribatida	unknown	M3	complete specimen	0.78
ECFN5315	Acari\Oribatida	unknown	M4	complete specimen	0.23
ECFN937	Acari\Oribatida	unknown	M5	complete specimen	0.34
ECFN5307	Acari\Oribatida	unknown	M6	complete specimen	0.36
ECFN5282	Acari\Oribatida	unknown	M7	complete specimen	0.9
ECFN5299	Acari\Oribatida	unknown	M8	complete specimen	0.45
ECFN5297	Acari\Oribatida	unknown	M9	complete specimen	0.72
ECFN5300	Acari	unknown	M10	complete specimen	0.43
ECFN5296	Acari\Oribatida	unknown	M11	complete specimen	0.82
ECFN5281	Acari\Oribatida	unknown	M12	complete specimen	0.6
ECFN5288	Acari\Oribatida	unknown	M13	complete specimen	0.64
ECFN5289	Acari	unknown	M14	complete specimen	0.81
ECFN5287	Acari	unknown	M15	complete specimen	0.47
ECFN5250	Arachnida\Araneae	Gnaphosidae	M1	carapace	1.78
ECFN5253	Arachnida\Araneae	Linyphiidae	M2	carapace	0.47
ECFN5212	Chilopoda	unknown	M1	complete specimen	8.46
ECFN5248	Insecta\Coleoptera	Carabidae	M1	complete abdomen	1.43
ECFN5251	Insecta\Coleoptera	Carabidae	M2	elytra	2.8
ECFN5236	Insecta\Coleoptera	Carabidae	M3	elytra	1.83
ECFN5243	Insecta\Coleoptera	Curculionidae	M1	elytra	3.17
ECFN5260	Insecta\Coleoptera	Curculionidae	M2	complete abdomen	3.26
ECFN5259	Insecta\Coleoptera	Curculionidae	M3	complete abdomen	1.03
ECFN5235	Insecta\Coleoptera	Curculionidae	M4	elytra	0.41
ECFN5277	Insecta\Coleoptera	Curculionidae	M5	complete abdomen	1.44
ECFN5247	Insecta\Coleoptera	Curculionidae	M6	complete specimen	2.39
ECFN5284	Insecta\Coleoptera	Curculionidae	M7	complete specimen	1.93
ECFN5254	Insecta\Coleoptera	Dasytidae	M1	elytra	2.09
ECFN11252	Insecta\Coleoptera	Elateridae	M1	larva	3.04
ECFN5271	Insecta\Coleoptera	Erotylidae	M1	elytra	1.23
ECFN5237	Insecta\Coleoptera	Erotylidae	M2	elytra	0.99
ECFN5261	Insecta\Coleoptera	Latridiidae	M1	complete abdomen	1.19
ECFN5257	Insecta\Coleoptera	Latridiidae	M2	complete abdomen	1.51
ECFN5213	Insecta\Coleoptera	Ptiliidae	M1	complete specimen	1.34
ECFN5264	Insecta\Coleoptera	Scolytidae	M1	elytra	1.43
ECFN5256	Insecta\Coleoptera	Staphylinidae	M1	abdomen	0.8
ECFN5241	Insecta\Coleoptera	Staphylinidae	M2	elytra	0.83
ECFN5245	Insecta\Coleoptera	Staphylinidae	M3	complete specimen	2.29
ECFN5268	Insecta\Coleoptera	Staphylinidae	M4	elytra	0.57
