# Supplementary material for: Path for recovery: an ecological overview of the Jambato Harlequin Toad (Bufonidae: Atelopus ignescens) in its last known locality, Angamarca Valley, Ecuador
Source: PeerJ. 2024 Jun 21;12:e17344. doi: 10.7717/peerj.17344 (PMC11195548; doi:10.7717/peerj.17344)
Supplement: Supplemental Information 6 [file peerj-12-17344-s006.xlsx]

## Sheet: Hoja1
Table S5.		1960 - 2021
		Temperature (ºC)		Precipitation (mm)
Code	Locality	mean	SD	mean	SD
Locality1	20 km Norte Riobamba (carretera Riobamba-Ambato)	9.1	0.46	67	19
Locality2	36.8 km NNE Guaranda	5.8	0.47	66	19
Locality3	Angamarca	8.1	0.46	60	16
Locality4	Cayambe	12.5	0.43	69	16
Locality5	Cráter de Pasochoa	7.3	0.43	86	24
Locality6	Guaranda	4.8	0.48	48	12
Locality7	Ingaloma	14.2	0.41	87	22
Locality8	Jardines Quinta San Agustín. Carretera Panamericana Sur km 26 desde Quito A 2 km desde la carretera	15	0.43	94	24
Locality9	Laguna de Mojanda	7.3	0.4	79	20
Locality10	Laguna La Mica	5	0.41	81	23
Locality11	Latacunga	13.3	0.44	45	13
Locality12	Limpiopungo	6	0.43	73	21
Locality13	Machachi	13.2	0.39	84	22
Locality14	Papallacta	8	0.42	99	29
Locality15	Páramo de Guamaní	6.1	0.41	86	25
Locality16	Páramo del Antisana	3.8	0.43	73	21
Locality17	Pie del volcán Chimborazo, vía Ambato - Guaranda	6.9	0.48	48	12
Locality18	Pintag	13	0.42	96	25
Locality19	Quijos-Oyacachi	7.1	0.43	92	26
Locality20	Quito	12.3	0.42	93	25
Locality21	Río Cutuchi	14.1	0.45	48	15
Locality22	Vía Salcedo-Oriente	7.3	0.44	89	28
Locality23	Zumbahua	6.7	0.45	66	18
